# Supplementary material for: Preparation, structure, and stability of Pt and Pd monolayer modified Pd and Pt electrocatalysts
Source: Royal Society of Chemistry journal article supplement (doi:10.1039/b823504j), 2009-01-01
Supplement: b823504j.pdf [file b823504j.pdf]

**Supplementary Information for DOI: 10.1039/b823504j**

The EXAFS data and corresponding Fourier transforms that were fitted to provide the structural parameters reported in tables 3 and 4 of the manuscript are provided below.

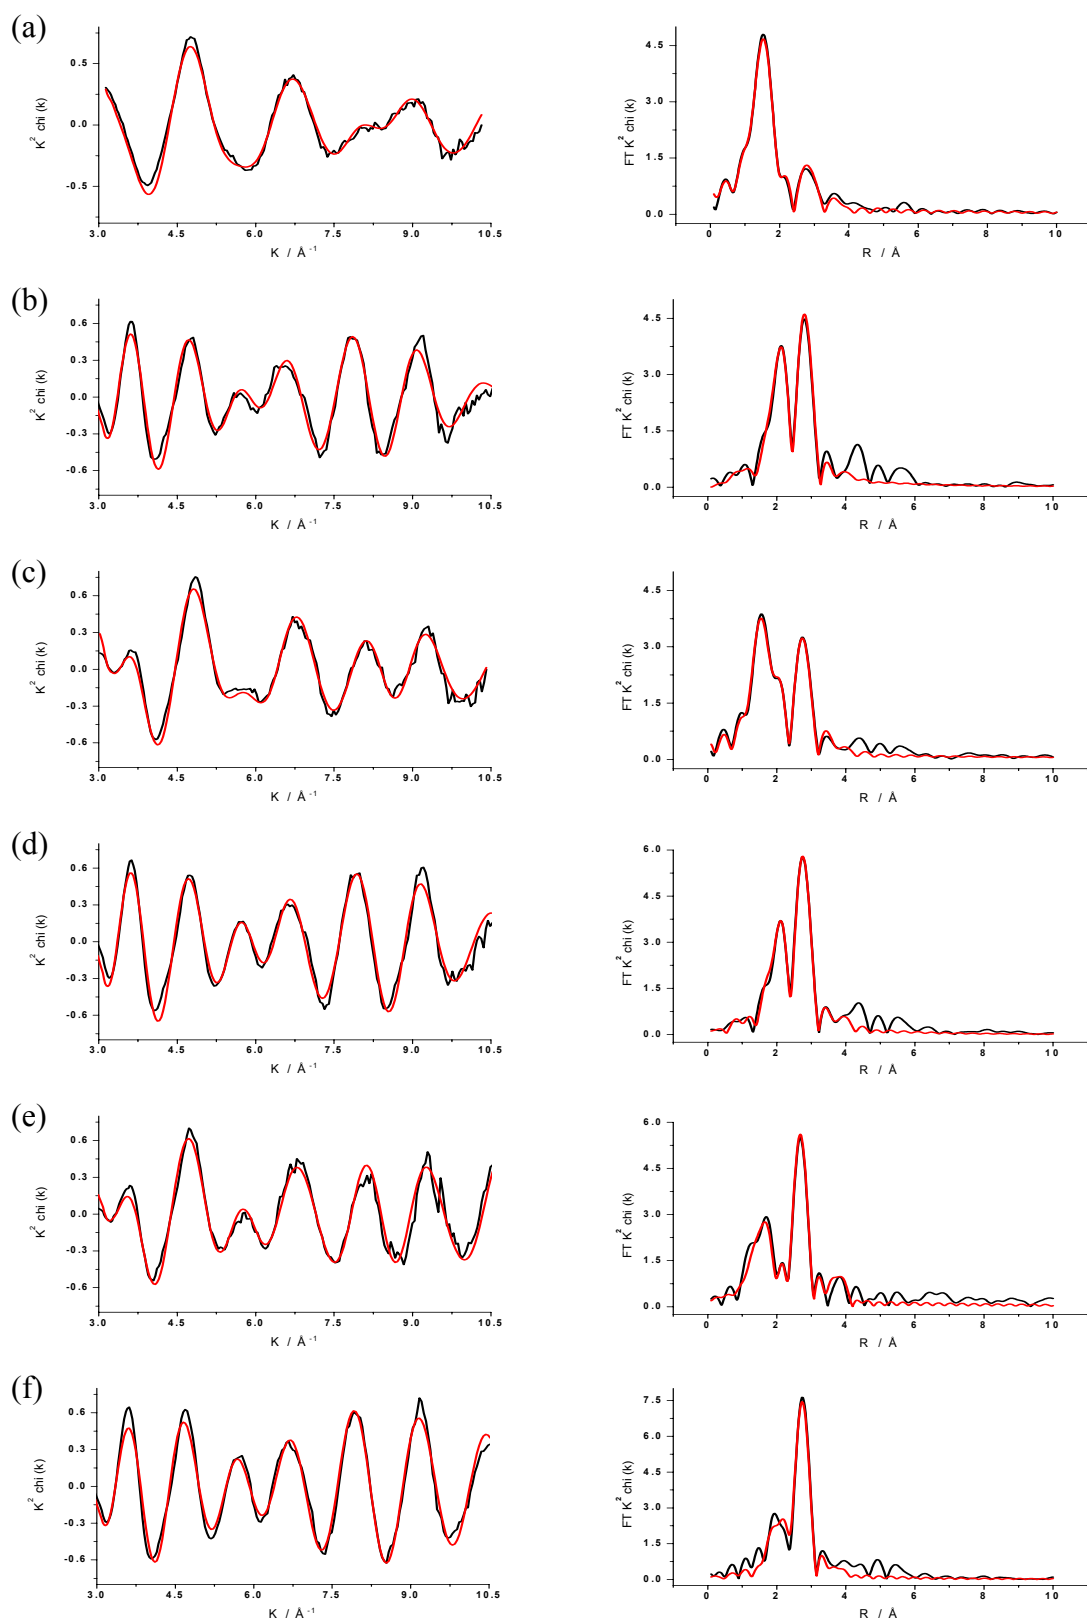

**Figure 1** Pd K edge (left)  $k^2$  weighted experimental data and fit along with (right) the Fourier transform for 0.5 Pd/Pt/C acquired in air and  $\text{H}_2$  (a & b), 1 Pd/Pt/C acquired in air and  $\text{H}_2$  (c & d), and 1.5 Pd/Pt/C acquired in air and  $\text{H}_2$  (e & f). Data (black line) and fit (red line).

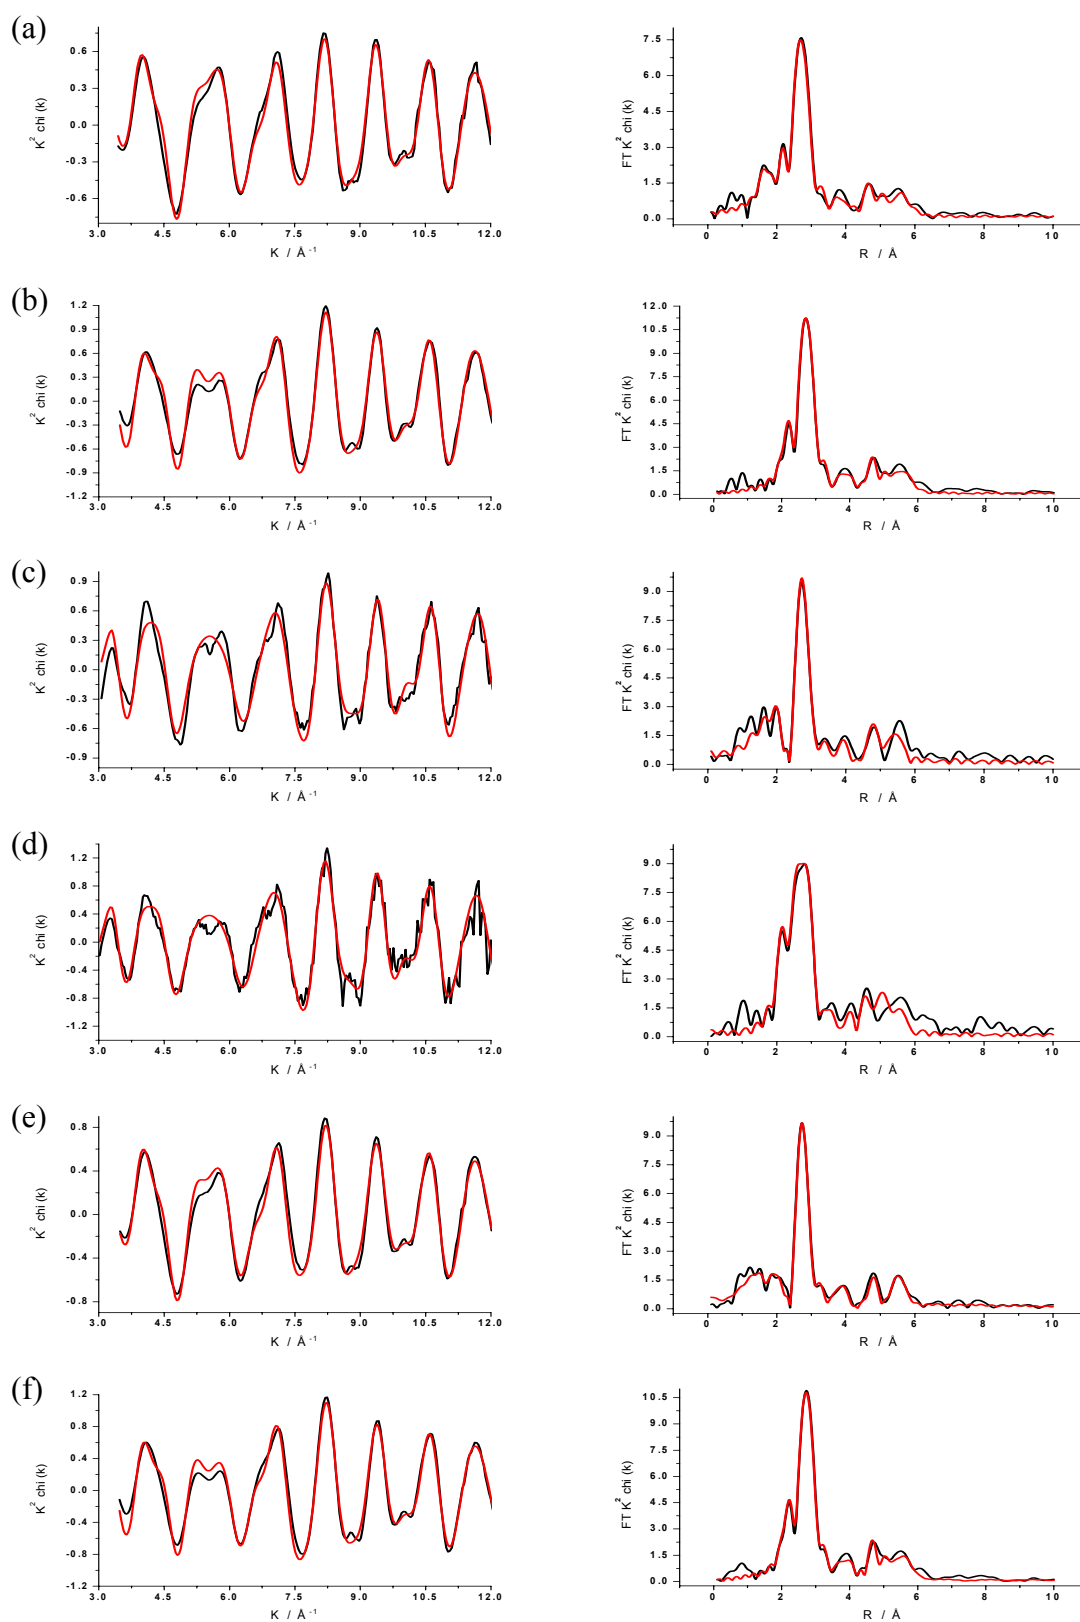

**Figure 2** Pt  $L_3$  edge (left)  $k^2$  weighted experimental data and fit along with (right) the Fourier transform for 0.5 Pd/Pt/C acquired in air and  $\text{H}_2$  (a & b), 1 Pd/Pt/C acquired in air and  $\text{H}_2$  (c & d), and 1.5 Pd/Pt/C acquired in air and  $\text{H}_2$  (e & f). Data (black line) and fit (red line)

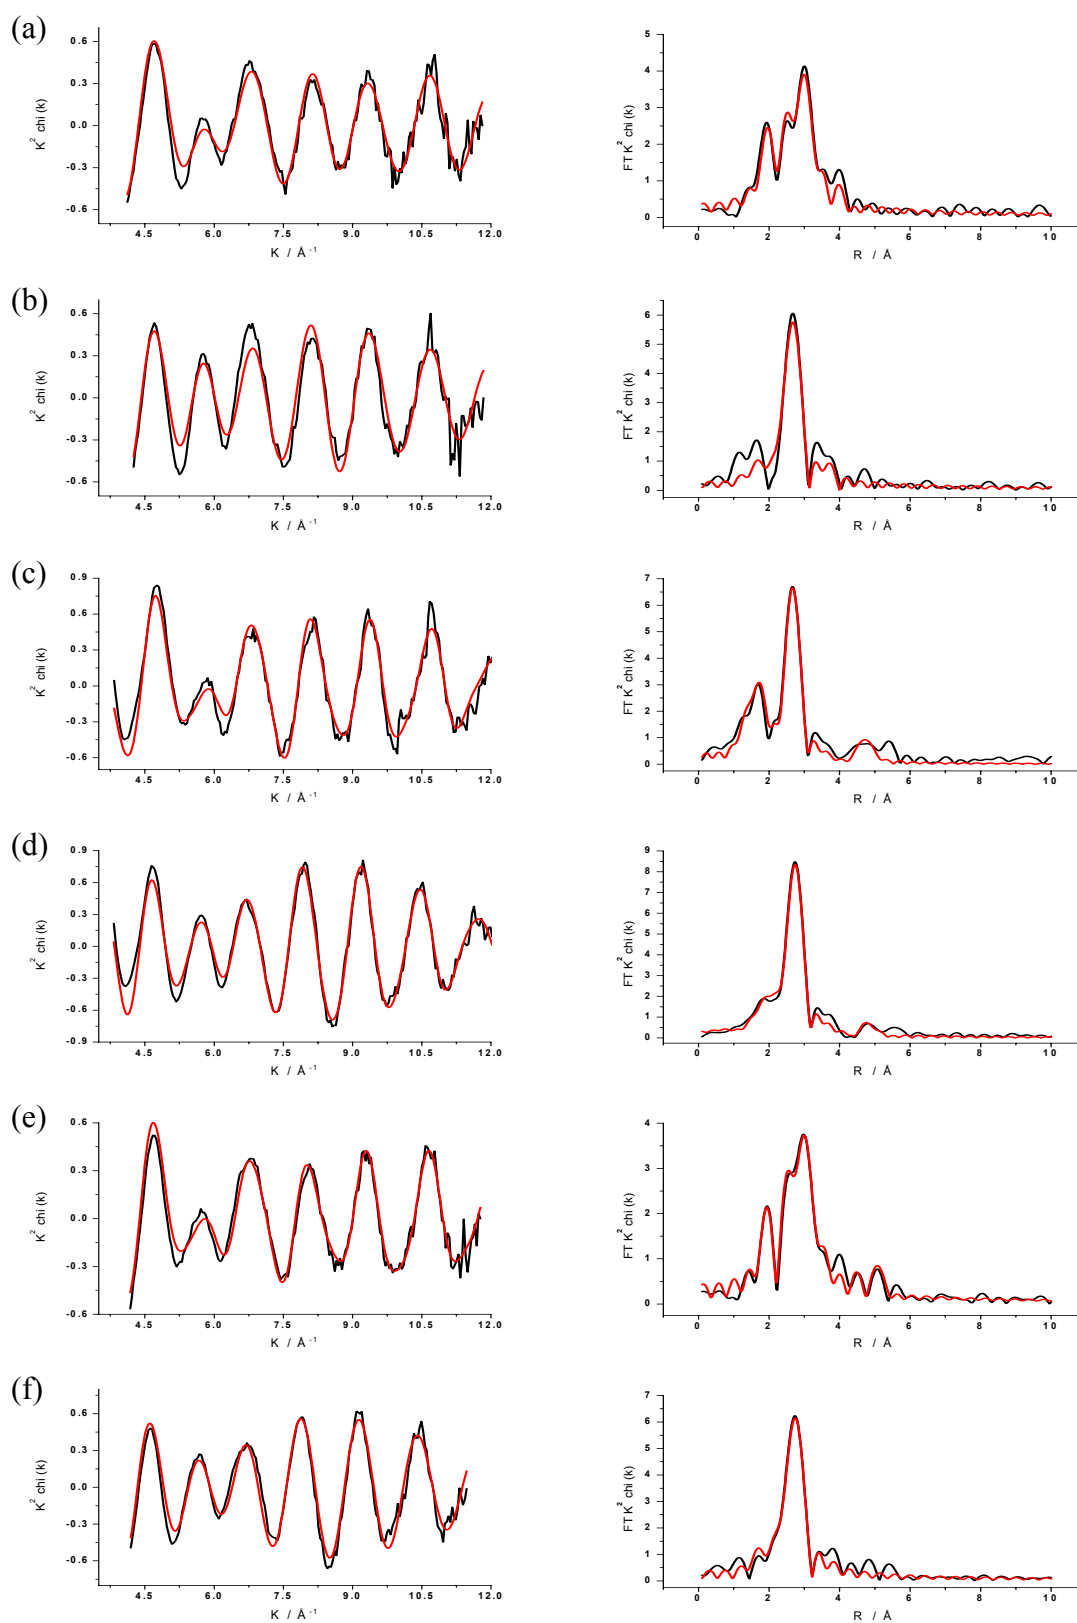

**Figure 3** Pd K edge (left)  $k^2$  weighted experimental data and fit along with (right) the Fourier transform for 0.5 Pt/Pd/C acquired in air and  $H_2$  (a & b), 1 Pt/Pd/C acquired in air and  $H_2$  (c & d), and 1.5 Pt/Pd/C acquired in air and  $H_2$  (e & f). Data (black line) and fit (red line).

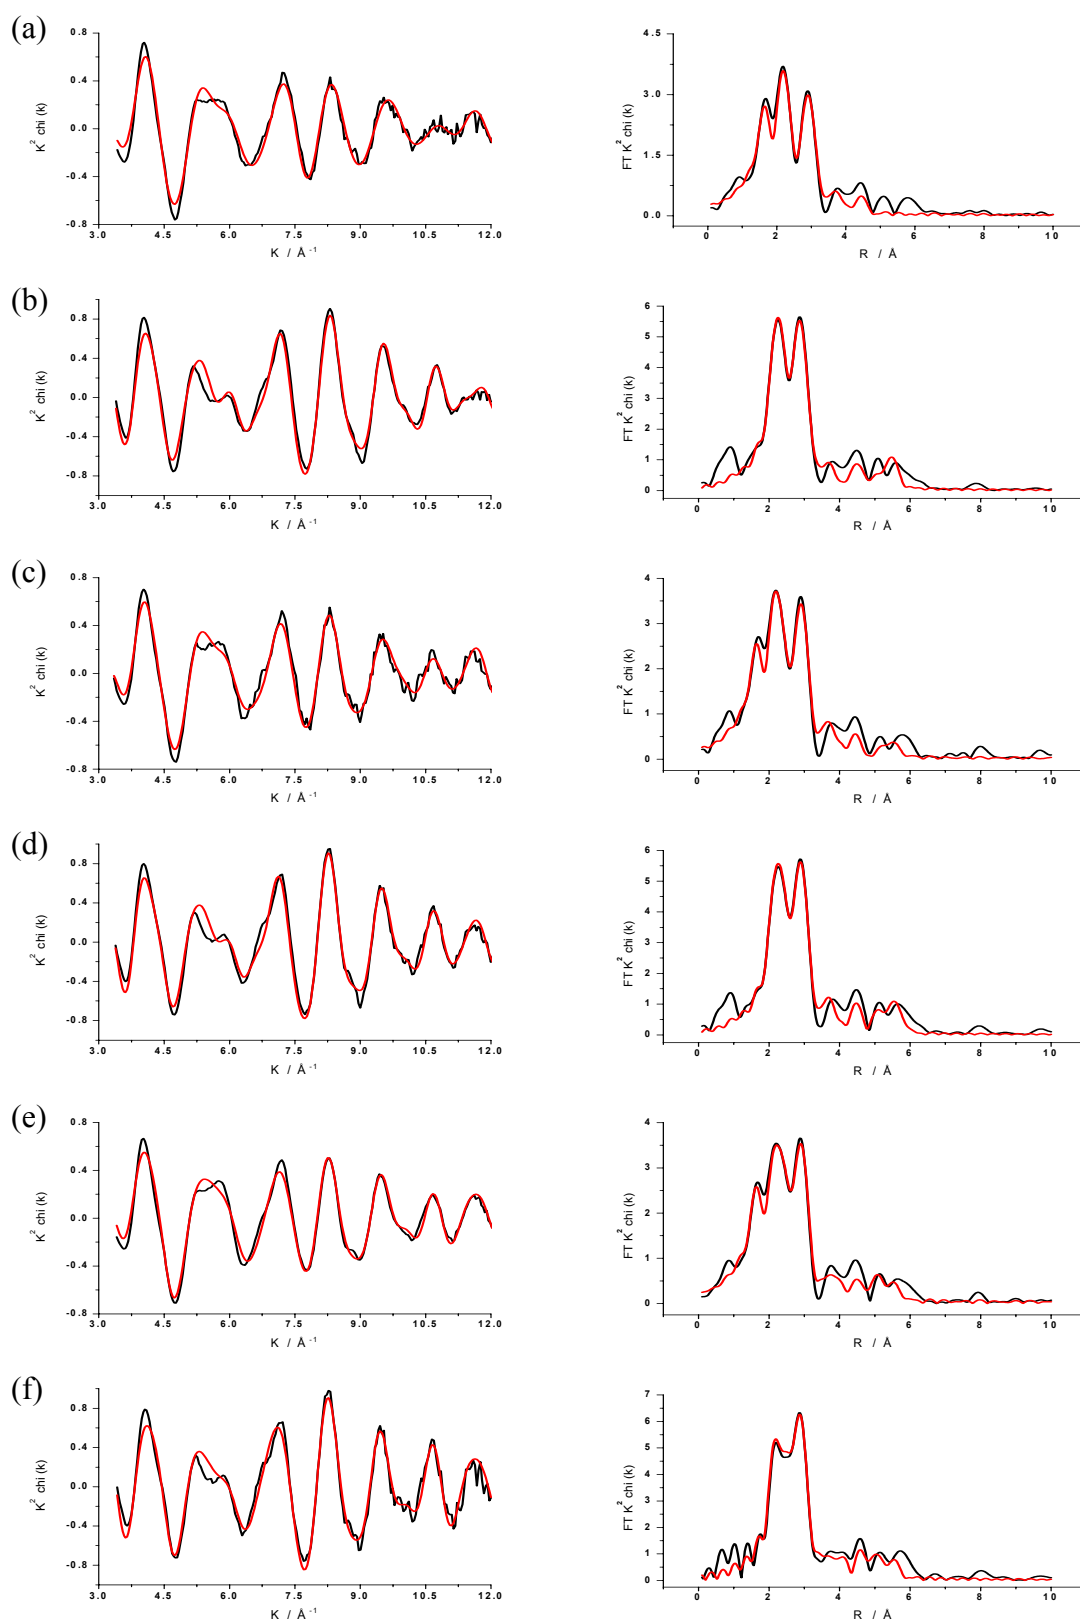

**Figure 4** Pt  $L_3$  edge (left)  $k^2$  weighted experimental data and fit along with (right) the Fourier transform for 0.5 Pt/Pd/C acquired in air and  $H_2$  (a & b), 1 Pt/Pd/C acquired in air and  $H_2$  (c & d), and 1.5 Pt/Pd/C acquired in air and  $H_2$  (e & f). Data (black line) and fit (red line).
